# Supplementary material for: Clinical, Molecular and Genetic Characteristics of Early Onset Gastric Cancer: Analysis of a Large Multicenter Study
Source: MDPI journal article supplement (doi:10.3390/cancers13133132), 2021-06-23
Supplement: s1 [file s1]

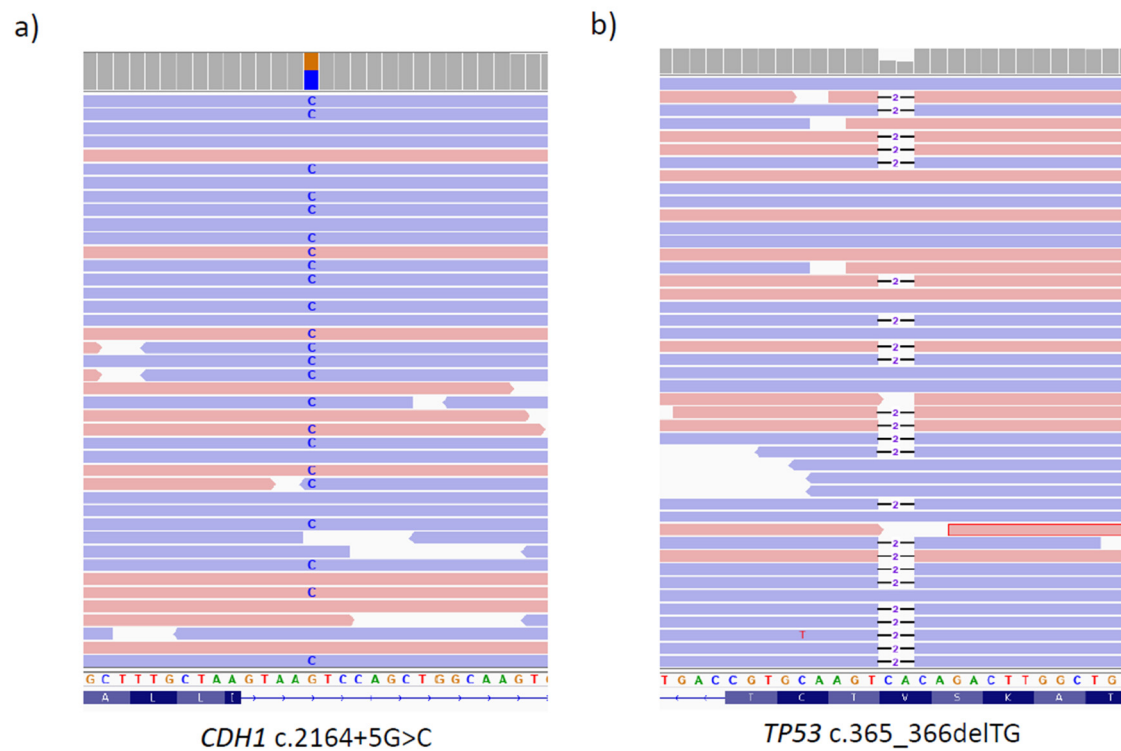

**Figure S1:** Example of visualization using Integrative Genomics Viewer of two of the germline variants identified. (a) *CDH1* c.2164+5G>C (splicing variant); (b) *TP53* c.365\_366delTG (p.Val122fs; frameshift variant).
